# Supplementary material for: Composition, Source Apportionment, and Health Risk of PM2.5-Bound Metals during Winter Haze in Yuci College Town, Shanxi, China
Source: MDPI journal article supplement (doi:10.3390/toxics10080467), 2022-08-11
Supplement: s1 [file s1]

## Supplementary Files

### 1. Detailed description of chemical analyses

PM<sub>2.5</sub>-bound metals, included As, Cd, Co, Cr, Cu, Ni, Pb, and Zn. were analyzed using an inductively coupled plasma-mass spectrometer (ICP-MS, Agilent 7700). Multi-element standards were obtained from Agilent, an internal standard solution for ICP-MS analysis, included Li, Sc, Ge, Y, Rh, In, Re and Bi (CFGG-163175-02-01), was obtained from the National Standard Samples Website, and high purity nitric acid and hydrofluoric acid were purchased from Beijing Chemical Reagent Factory (Beijing, China). Analytical methods are presented below.

#### *Digestion*

The half filter was cut into small pieces with ceramic scissors and put into a digestion cell. The digestion was carried out on a microwave digestion system (WX-6000, PreeKem Scientific Instruments Co., Ltd.) with a digestion solution of 10 mL mix of nitric acid and Hydrochloric acid. The program for microwave digestion was heated to 100 °C within 5 min, held at 100 °C for 2 min; then to 150 °C within 5min, and held at 150 °C for 3 min. Final to 200 °C within 5 min, and held at 200 °C for 15 min. After cooling, 10 mL of triple-distilled water was injected into the tubes and set for 30 min, and then the solution was filtered to remove impurities and diluted by triple-distilled water to 20 mL, finally stored at 4 °C for analysis.

#### *Instrumental analysis*

Internal calibration was used to quantify the target metals, all samples were spiked with internal standard solution, the isotope of each element and its corresponding internal

standard were selected and presented in **Table S1**[1]. The concentrations of metal analysis were conducted on an ICP-MS. The RF power, S/C temperature, and analyzer pressure were set at 1550 W, 2 °C, and  $1 \times 10^{-4}$  Pa, respectively. Argon was used as carrier gas and circuit flow was at 1 L/min.

**Table S1.** Isotopes of heavy metals, corresponding internal standards, and detection limit for ICP-MS analysis

| Elements | Isotope <sup>a</sup> | Internal standard <sup>a</sup> | Detection limit (ng·m <sup>-3</sup> ) |
|----------|----------------------|--------------------------------|---------------------------------------|
| As       | 75                   | <sup>74</sup> Ge               | 0.4                                   |
| Cd       | 111                  | <sup>115</sup> In              | 0.03                                  |
| Co       | 59                   | <sup>74</sup> Ge               | 0.03                                  |
| Cr       | 52                   | <sup>45</sup> Sc               | 0.3                                   |
| Cu       | 63                   | <sup>74</sup> Ge               | 0.6                                   |
| Ni       | 60                   | <sup>74</sup> Ge               | 0.2                                   |
| Pb       | 208                  | <sup>209</sup> Bi              | 0.6                                   |
| Zn       | 66                   | <sup>74</sup> Ge               | 3                                     |

<sup>a</sup>The data were obtained from the National Environmental Protection Standards of China (HJ 657-2013)[1].

#### *Quality assurance and quality control*

The detect limitation for eight metals were presented at Table S1. Moreover, solvent blanks, standard reference materials were processed three duplicates for Quality assurance and quality control. As a result, the concentrations of heavy metals in blanks were not detected, the recoveries of target metals were in the range of 95.3% – 108.2%, and their relative deviation were < 6% for all batch treatments. In addition, each batch of 10 samples was typically checked with at least one calibration standard solution and the relative

differences between the calibration curve and the checks were all within 10%.

The performance of the instruments was checked with a calibration standard every 10 samples, and the relative differences between the calibration curve and the daily checks were all within 20%. Solvent blank, matrix blank (control soil), matrix spike, and matrix spike duplicate were processed for every 10 samples. And the recoveries of target metals were in the range of 97.6% – 106.2%. External calibration was used to quantify the target metals, and the eight calibration standards ranging from 1 to 100 mg/L of each metal were prepared by serial dilution from the stock solution (10 mg/mL) using 2% nitric acid. The recoveries of the metals spiked in the control sediment were 78%–129%.

**Table S2.** PM<sub>2.5</sub> mass ( $\mu\text{g}\cdot\text{m}^{-3}$ ) and its metals concentrations ( $\text{ng}\cdot\text{m}^{-3}$ ) during winter in 2020 in the college town of Shanxi Province, China ( $n = 34$ )

| No. | Date  | PM <sub>2.5</sub> | As    | Cd   | Co   | Cr (VI) | Cu    | Ni   | Pb    | Zn     | Total  |
|-----|-------|-------------------|-------|------|------|---------|-------|------|-------|--------|--------|
| 1   | 11.3  | 55                | 5.49  | 1.87 | 0.58 | 2.08    | 22.56 | 1.87 | 17.73 | 353.93 | 406.11 |
| 2   | 11.4  | 71                | 7.42  | 2.12 | 0.60 | 2.81    | 40.55 | 4.27 | 24.10 | 823.39 | 905.26 |
| 3   | 11.5  | 102               | 11.36 | 4.88 | 1.43 | 2.91    | 43.44 | 6.82 | 40.52 | 416.51 | 527.87 |
| 4   | 11.6  | 73                | 5.94  | 1.35 | 1.61 | 2.32    | 25.66 | 5.40 | 34.04 | 218.22 | 294.54 |
| 5   | 11.7  | 63                | 2.35  | 0.76 | 0.93 | 0.54    | 12.36 | 1.72 | 9.10  | 231.33 | 259.09 |
| 6   | 11.8  | 56                | 3.61  | 0.47 | 0.53 | 1.06    | 9.37  | 2.25 | 17.15 | 140.77 | 175.21 |
| 7   | 11.9  | 60                | 2.93  | 0.44 | 0.51 | 0.82    | 13.27 | 2.25 | 6.29  | 182.69 | 209.2  |
| 8   | 11.1  | 97                | 4.36  | 0.67 | 0.36 | 0.92    | 21.01 | 1.72 | 18.82 | 196.51 | 244.37 |
| 9   | 11.11 | 114               | 5.81  | 0.69 | 0.21 | 0.75    | 12.03 | 1.17 | 16.39 | 144.13 | 181.18 |
| 10  | 11.12 | 114               | 5.96  | 0.95 | 0.61 | 1.20    | 22.19 | 3.26 | 22.55 | 147.8  | 204.52 |
| 11  | 11.13 | 97                | 4.23  | 0.76 | 0.13 | 0.74    | 20.44 | 1.93 | 7.53  | 214.99 | 250.75 |
| 12  | 11.14 | 119               | 2.50  | 0.52 | 0.24 | 0.76    | 6.16  | 1.18 | 7.11  | 136.7  | 155.17 |
| 13  | 11.15 | 89                | 2.83  | 0.67 | 0.02 | 0.91    | 8.53  | 1.79 | 9.64  | 274.31 | 298.7  |
| 14  | 11.16 | 127               | 4.18  | 0.25 | 0.02 | 0.60    | 6.63  | 0.99 | 2.02  | 172.7  | 187.39 |
| 15  | 11.17 | 21                | 1.44  | 0.07 | 0.05 | 0.45    | 0.69  | 0.51 | 1.04  | 164.32 | 168.57 |
| 16  | 11.21 | 37                | 2.31  | 0.62 | 0.14 | 0.39    | 5.40  | 1.32 | 2.98  | 141.72 | 154.88 |
| 17  | 11.22 | 70                | 4.21  | 0.44 | 0.01 | 0.75    | 6.95  | 0.33 | 4.17  | 163.02 | 179.88 |
| 18  | 11.23 | 68                | 5.21  | 0.93 | 0.11 | 1.99    | 63.70 | 1.72 | 18.89 | 128.59 | 221.14 |
| 19  | 11.24 | 128               | 10.88 | 0.82 | 0.17 | 1.95    | 36.28 | 3.09 | 16.13 | 182.31 | 251.63 |
| 20  | 11.25 | 174               | 4.53  | 0.54 | 0.18 | 0.96    | 7.53  | 1.45 | 15.46 | 121.11 | 151.76 |
| 21  | 11.26 | 131               | 5.73  | 1.03 | 0.17 | 2.55    | 44.72 | 0.51 | 17.58 | 170.88 | 243.17 |
| 22  | 11.27 | 59                | 5.75  | 0.56 | 0.04 | 1.05    | 7.99  | 0.68 | 15.20 | 88.24  | 119.51 |
| 23  | 11.28 | 68                | 1.24  | 0.45 | 0.08 | 0.79    | 9.47  | 0.47 | 15.17 | 109.34 | 137.01 |
| 24  | 11.29 | 103               | 5.95  | 1.10 | 0.09 | 2.51    | 41.66 | 1.33 | 30.12 | 86.07  | 168.83 |
| 25  | 11.3  | 46                | 2.88  | 0.17 | 0.03 | 0.59    | 13.54 | 0.43 | 5.27  | 20.63  | 43.54  |
| 26  | 12.1  | 75                | 1.63  | 0.20 | 0.01 | 0.74    | 10.42 | 1.09 | 13.12 | 0.71   | 27.92  |
| 27  | 12.2  | 94                | 3.20  | 0.50 | 0.09 | 1.07    | 15.21 | 0.66 | 19.69 | 41.81  | 82.23  |
| 28  | 12.3  | 17                | 0.43  | 0.04 | 0.03 | 0.64    | 5.69  | 0.22 | 6.93  | 22.96  | 36.94  |
| 29  | 12.4  | 48                | 4.19  | 0.94 | 0.13 | 1.65    | 7.30  | 4.04 | 10.33 | 215.86 | 244.44 |
| 30  | 12.5  | 80                | 7.12  | 0.75 | 0.02 | 1.39    | 25.12 | 0.95 | 13.45 | 294.95 | 343.75 |
| 31  | 12.6  | 95                | 8.16  | 1.87 | 0.15 | 2.43    | 67.15 | 1.50 | 27.94 | 372.3  | 481.5  |
| 32  | 12.7  | 43                | 2.20  | 0.71 | 0.24 | 1.01    | 2.57  | 1.72 | 10.18 | 149.59 | 168.22 |
| 33  | 12.8  | 44                | 3.62  | 0.67 | 0.06 | 0.97    | 5.28  | 0.69 | 13.38 | 163.72 | 188.39 |
| 34  | 12.9  | 104               | 10.65 | 1.29 | 0.15 | 2.38    | 40.41 | 2.38 | 18.15 | 231.54 | 306.95 |

**Table S3.** The consumption, composition, and their proportion (%) of end-use energy (million ton) in recent years in Shanxi Province, China

| Year | Coal    | Washed coal | Coke    | Petroleum | Electricity | Gas and others | Total    | References |
|------|---------|-------------|---------|-----------|-------------|----------------|----------|------------|
| 2013 | 45.8666 | 6.9094      | 22.5186 | 12.1254   | 54.0386     | 22.8122        | 164.2708 | [2]        |
| 2014 | 42.4682 | 6.1540      | 21.1541 | 10.9299   | 53.5868     | 28.9590        | 163.2519 | [3]        |
| 2015 | 40.7302 | 5.8018      | 20.2386 | 11.3328   | 50.9618     | 29.0677        | 158.1329 | [4]        |
| 2016 | 40.8313 | 3.6983      | 21.3523 | 11.8801   | 52.6514     | 29.1696        | 159.5830 | [5]        |
| 2017 | 42.8102 | 3.6236      | 19.0272 | 12.8570   | 57.8891     | 32.1608        | 168.3679 | [6]        |
| 2018 | 30.8398 | 2.4629      | 22.7407 | 11.4748   | 66.2480     | 34.3566        | 168.1228 | [7]        |
| 2019 | 30.5186 | 2.3585      | 24.3858 | 12.0558   | 67.8286     | 37.5838        | 174.7311 | [8]        |
| 2020 | 29.3988 | 2.5966      | 25.9865 | 10.0944   | 70.5441     | 40.7518        | 179.3722 | [9]        |
| 2013 | 27.92   | 4.21        | 13.71   | 7.38      | 32.90       | 13.89          | 100      |            |
| 2014 | 26.01   | 3.77        | 12.96   | 6.70      | 32.82       | 17.74          | 100      |            |
| 2015 | 25.76   | 3.67        | 12.80   | 7.17      | 32.23       | 18.38          | 100      |            |
| 2016 | 25.59   | 2.32        | 13.38   | 7.44      | 32.99       | 18.28          | 100      |            |
| 2017 | 25.43   | 2.15        | 11.30   | 7.64      | 34.38       | 19.10          | 100      |            |
| 2018 | 18.34   | 1.46        | 13.53   | 6.83      | 39.40       | 20.44          | 100      |            |
| 2019 | 17.47   | 1.35        | 13.96   | 6.90      | 38.82       | 21.51          | 100      |            |
| 2020 | 16.39   | 1.45        | 14.49   | 5.63      | 39.33       | 22.72          | 100      |            |

**Table S4.** The days reached the standards of air quality in recent years and the annual mean concentrations of PM<sub>2.5</sub> ( $\mu\text{g}\cdot\text{m}^{-3}$ ) in Jinzhong, Shanxi Province, China

| Year | Sources     | Days | PM <sub>2.5</sub> | Internet addresses                                                                                                              |
|------|-------------|------|-------------------|---------------------------------------------------------------------------------------------------------------------------------|
| 2014 | Table 19-77 | 241  | 64                | <a href="http://tjj.shanxi.gov.cn/tjsj/tjnj/nj2015/indexch.htm">http://tjj.shanxi.gov.cn/tjsj/tjnj/nj2015/indexch.htm</a>       |
| 2015 | Table 19-72 | 245  | 57                | <a href="http://tjj.shanxi.gov.cn/tjsj/tjnj/nj2016/indexch.htm">http://tjj.shanxi.gov.cn/tjsj/tjnj/nj2016/indexch.htm</a>       |
| 2016 | Table 19-72 | 226  | 62                | <a href="http://tjj.shanxi.gov.cn/tjsj/tjnj/nj2017/indexch.htm">http://tjj.shanxi.gov.cn/tjsj/tjnj/nj2017/indexch.htm</a>       |
| 2017 | Table 19-71 | 183  | 59                | <a href="http://tjj.shanxi.gov.cn/tjsj/tjnj/nj2018/indexch.htm">http://tjj.shanxi.gov.cn/tjsj/tjnj/nj2018/indexch.htm</a>       |
| 2018 | Table 19-65 | 210  | 55                | <a href="http://tjj.shanxi.gov.cn/tjsj/tjnj/nj2019/zk/indexch.htm">http://tjj.shanxi.gov.cn/tjsj/tjnj/nj2019/zk/indexch.htm</a> |
| 2019 | Table 19-71 | 229  | 45                | <a href="http://tjj.shanxi.gov.cn/tjsj/tjnj/nj2020/zk/indexch.htm">http://tjj.shanxi.gov.cn/tjsj/tjnj/nj2020/zk/indexch.htm</a> |
| 2020 | Table 19-59 | 267  | 42                | <a href="http://tjj.shanxi.gov.cn/tjsj/tjnj/nj2021/zk/indexch.htm">http://tjj.shanxi.gov.cn/tjsj/tjnj/nj2021/zk/indexch.htm</a> |

NOAA HYSPLIT MODEL  
Backward trajectories ending at 1600 UTC 25 Nov 20  
GDAS Meteorological Data

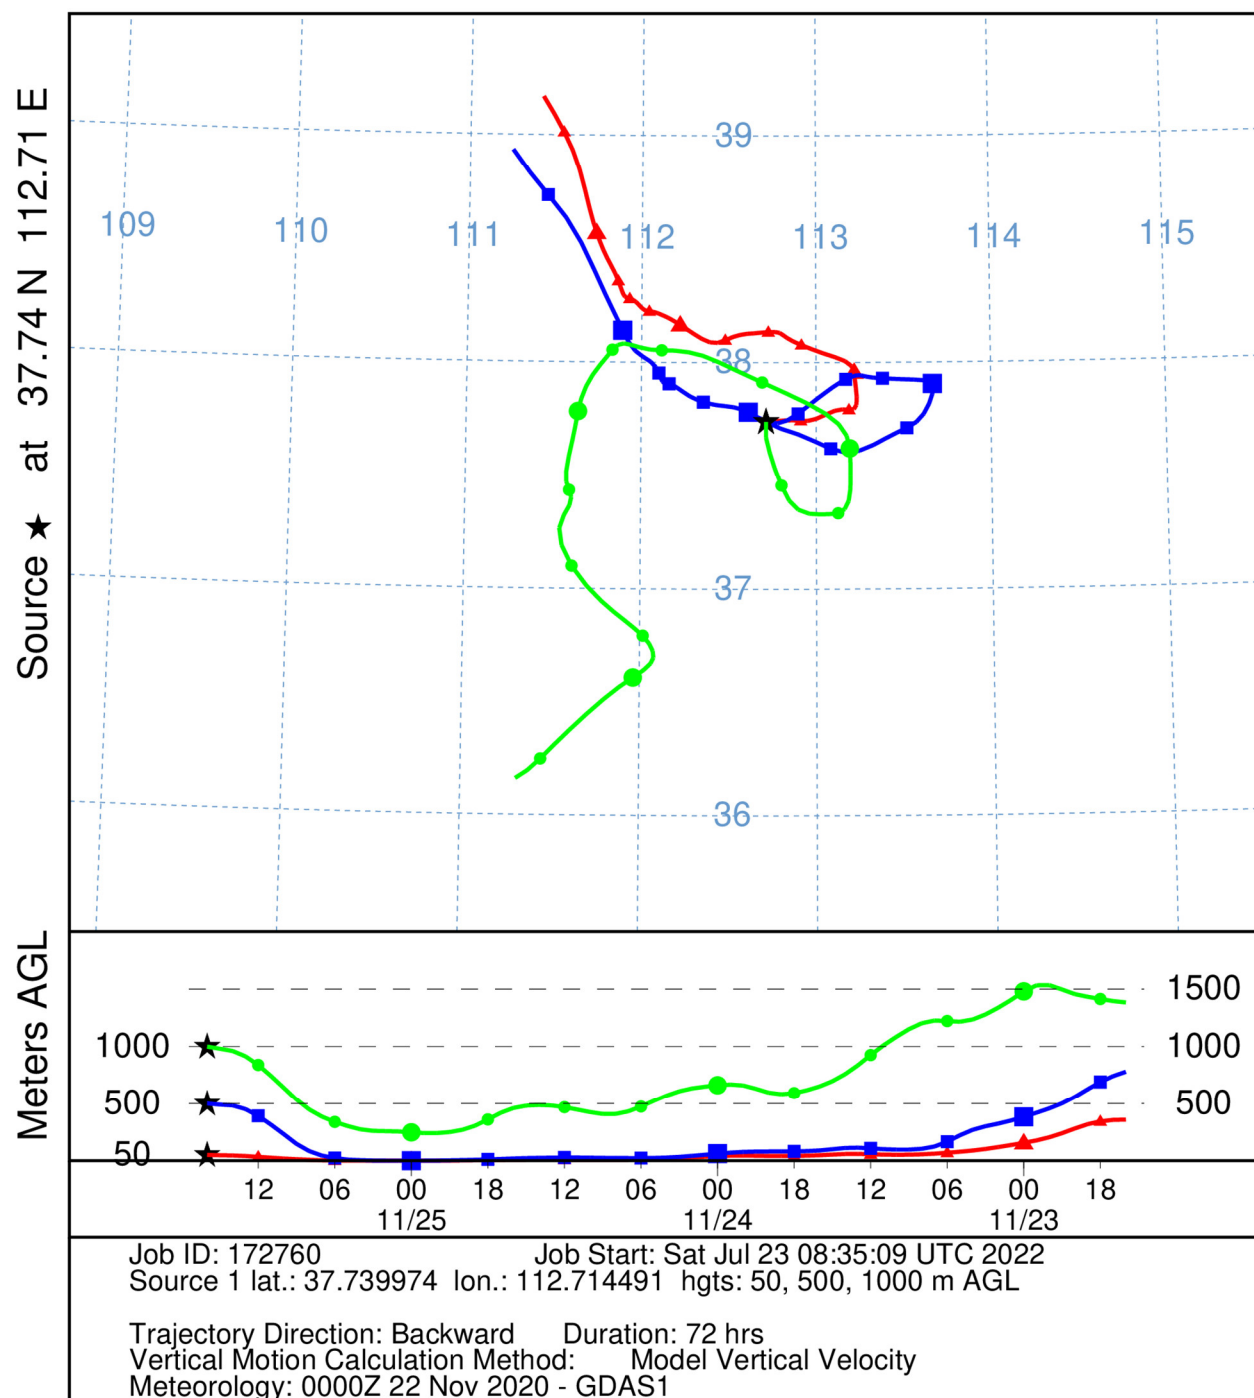

**Figure S1.** The 72-h back trajectories on 25 November 2020 in Yuci College Town, Shanxi, China.

## References

1. NEPSC. *Ambient air and stationary source emission: Determination of metals in ambient particulate matter—Inductively coupled plasma/mass spectrometry (ICP-MS) (in Chinese)*; National Environmental Protection Standards of China: Beijing, China, 2013.
2. SSY. *Table 6-15: Consumption and composition of end-use energy in 2013*; Shanxi Statistics Yearbook: <http://tjj.shanxi.gov.cn/tjsj/tjnj/nj2014/html/njcx.htm>, 2014.
3. SSY. *Table 6-13: Consumption and composition of end-use energy in 2014*; Shanxi Statistics Yearbook: <http://tjj.shanxi.gov.cn/tjsj/tjnj/nj2015/indexch.htm>, 2015.
4. SSY. *Table 6-13: Consumption and composition of end-use energy in 2015*; Shanxi Statistics Yearbook: <http://tjj.shanxi.gov.cn/tjsj/tjnj/nj2016/indexch.htm>, 2016.
5. SSY. *Table 6-13: Consumption and composition of end-use energy in 2016*; Shanxi Statistics Yearbook: <http://tjj.shanxi.gov.cn/tjsj/tjnj/nj2017/indexch.htm>, 2017.
6. SSY. *Table 6-13: Consumption and composition of end-use energy in 2017*; Shanxi Statistics Yearbook: <http://tjj.shanxi.gov.cn/tjsj/tjnj/nj2018/indexch.htm>, 2018.
7. SSY. *Table 6-13: Consumption and composition of end-use energy in 2018*; Shanxi Statistics Yearbook: <http://tjj.shanxi.gov.cn/tjsj/tjnj/nj2019/zk/indexch.htm>, 2020.
8. SSY. *Table 6-14: Consumption and composition of end-use energy in 2019*; Shanxi Statistics Yearbook: <http://tjj.shanxi.gov.cn/tjsj/tjnj/nj2020/zk/indexch.htm>, 2020.
9. SSY. *Table 6-13: Consumption and composition of end-use energy in 2020*; Shanxi Statistics Yearbook: <http://tjj.shanxi.gov.cn/tjsj/tjnj/nj2021/zk/indexch.htm>, 2021.
